# Supplementary material for: Drying with no concentration gradient in large microfluidic droplets
Source: Royal Society of Chemistry journal article supplement (doi:10.1039/c5sm00299k), 2015-01-01
Supplement: c5sm00299k4.pdf [file c5sm00299k4.pdf]

# Supporting Information for Drying with no Concentration Gradient in Large Microfluidic Droplets<sup>†</sup>

Nadia Ziane, Matthieu Guirardel, Jacques Leng and Jean-Baptiste Salmon\*

Received Xth XXXXXXXXXXXX 20XX, Accepted Xth XXXXXXXXXXXX 20XX

First published on the web Xth XXXXXXXXXXXX 200X

DOI: 10.1039/b000000x

## Movies

**Gold\_nanoparticles.avi** shows a typical experiment with a dilute dispersion of gold nanoparticles (see Fig. 6a in the main text). Images are obtained thanks to a CCD color camera (movie duration  $\approx 90$  min, 1 frame/10 s). **Peg\_salt.avi** shows a typical experiment evidencing liquid-liquid demixion in the ternary mixture made of polymer and salt in water (see Fig. 7 in the main text, movie duration  $\approx 90$  min, 1 frame/8 s). **Glycerol.avi** corresponds to the case of glycerol (see Fig. 8 in the main text, movie duration  $\approx 80$  min, 1 frame/8 s). For these three movies, the design of the chip is displayed Fig. 2 in the main text.
